# Supplementary material for: A Mobile Prenatal Care App to Reduce In-Person Visits: Prospective Controlled Trial
Source: PubMed Central journal article supplement (PMC6658303; doi:10.2196/10520), 2019-05-01
Supplement: mhealth_v7i5e10520_app1.pdf [file mhealth_v7i5e10520_app1.pdf]

|                           |    |
|---------------------------|----|
| Alcoholism                | 1  |
| BMI > 35                  | 18 |
| Cerclage                  | 4  |
| Coagulopathy              | 5  |
| Diabetes                  | 1  |
| Endometriosis             | 1  |
| h/o GDM                   | 1  |
| h/o HELLP                 | 2  |
| h/o Multiple Miscarriages | 1  |
| h/o Myomectomies          | 2  |
| h/o Pre-term Birth        | 7  |
| h/o Preeclampsia          | 6  |
| Hypertensive              | 16 |
| Hyperthyroid              | 1  |
| Hypothyroid               | 3  |
| IUGR                      | 1  |
| IVF Pregnancy             | 4  |
| Mullerian Anomaly         | 5  |
| Twin Births               | 8  |
| Oligohydramnios           | 1  |
| Placenta Previa           | 1  |
| Placental Abruption       | 1  |
| Rheumatoid Arthritis      | 1  |
| Seizure Disorder          | 1  |
| Severe Nausea/Vomiting    | 1  |
